# Supplementary material for: Fabrication of Hydrogen Boride Thin Film by Ion Exchange in MgB2
Source: MDPI journal article supplement (doi:10.3390/molecules26206212), 2021-10-14
Supplement: s1 [file s1]

## Supplementary Information

### Fabrication of Hydrogen Boride Thin Film by Ion Exchange in MgB<sub>2</sub>

T. Hirabayashi<sup>1,2,†</sup>, S. Yasuhara<sup>1,†</sup>, S. Shoji<sup>1,3</sup>, A. Yamaguchi<sup>1</sup>, H. Abe<sup>4</sup>, S. Ueda<sup>5,6,7</sup>, H. Zhu<sup>2</sup>, T. Kondo<sup>8,9,\*</sup> and M. Miyauchi<sup>1,\*</sup>

<sup>1</sup> Department of Materials Science and Engineering, School of Materials and Chemical Technology, Tokyo Institute of Technology, 2-12-1, Ookayama, Meguro-ku, Tokyo 152-8552, Japan.

<sup>2</sup> Department of Mechanical Engineering, School of Materials Science and Engineering, Tsinghua University, Beijing 100084, China.

<sup>3</sup> Department of Materials Science & Engineering, Cornell University, Ithaca, NY 14853, USA.

<sup>4</sup> Center for Green Research on Energy and Environmental Materials, National Institute for Materials Science, 1-1, Namiki, Tsukuba, Ibaraki 305-0044, Japan.

<sup>5</sup> Synchrotron X-ray Station at SPring-8, National Institute for Materials Science, 1-1-1 Kouto, Sayo, Hyogo 679-5148, Japan.

<sup>6</sup> Research Center for Advanced Measurement and Characterization, National Institute for Materials Science, 1-2-1 Sengen, Tsukuba, Ibaraki 305-0047, Japan.

<sup>7</sup> Research Center for Functional Materials, National Institute for Materials Science, 1-1 Namiki, Tsukuba, Ibaraki 305-0044, Japan.

<sup>8</sup> Department of Materials Science and Tsukuba Research Center for Energy Materials Science, Faculty of Pure and Applied Sciences, University of Tsukuba, 1-1-1, Tennodai, Tsukuba, Ibaraki 305-8573, Japan.

<sup>9</sup> Materials Research Center for Element Strategy, Tokyo Institute of Technology, 4259 Nagatsuta-cho, Midori-ku, Yokohama, Kanagawa 226-8503, Japan.

\* Correspondence: takahiro@ims.tsukuba.ac.jp, mmiyauchi@ceram.titech.ac.jp

† The 1st and 2nd authors equally contributed to this work.

**Table S1** Expected candidates of B-rich magnesium boride compounds ( $\text{MgB}_x$ ) produced due to insufficient Mg supply and their XRD peaks

|                | $2\theta(\text{degree})$ | $d(\text{\AA})$ | $(h\ k\ l)$ |
|----------------|--------------------------|-----------------|-------------|
| $\text{MgB}_3$ | 42.07                    | 2.148           | (1 1 2)     |
|                | 42.61                    | 2.122           | (0 0 3)     |
|                | 44.01                    | 2.058           | (2 0 0)     |
| $\text{MgB}_4$ | 41.89                    | 2.157           | (0 1 3)     |
| $\text{MgB}_7$ | 41.32                    | 2.185           | (2 3 1)     |
|                | 42.29                    | 2.137           | (0 3 3)     |
|                | 44.71                    | 2.027           | (0 5 1)     |

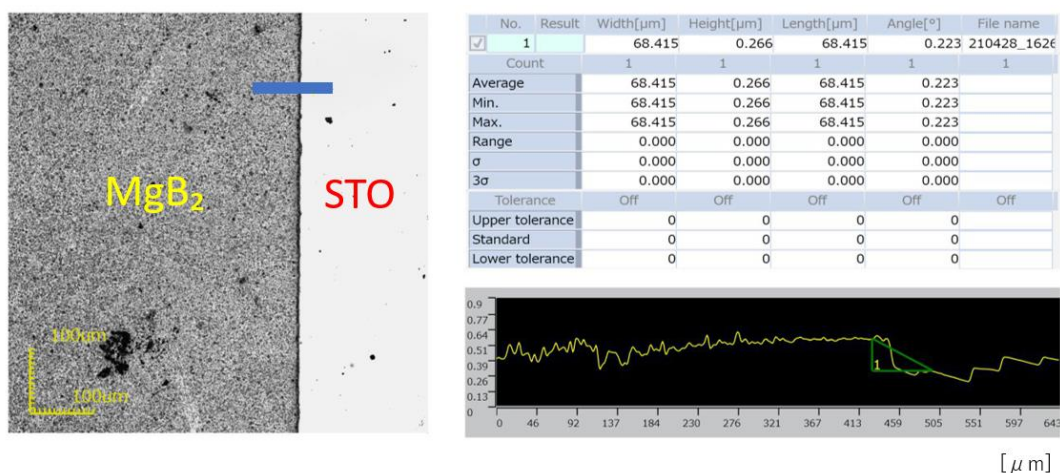

**Figure S1** Microscope image at the edge of the MgB<sub>2</sub> film (left photo), and its depth profile analyzed by laser microscope (right image). Blue line in the photo represents the line for depth profile shown in the right image.

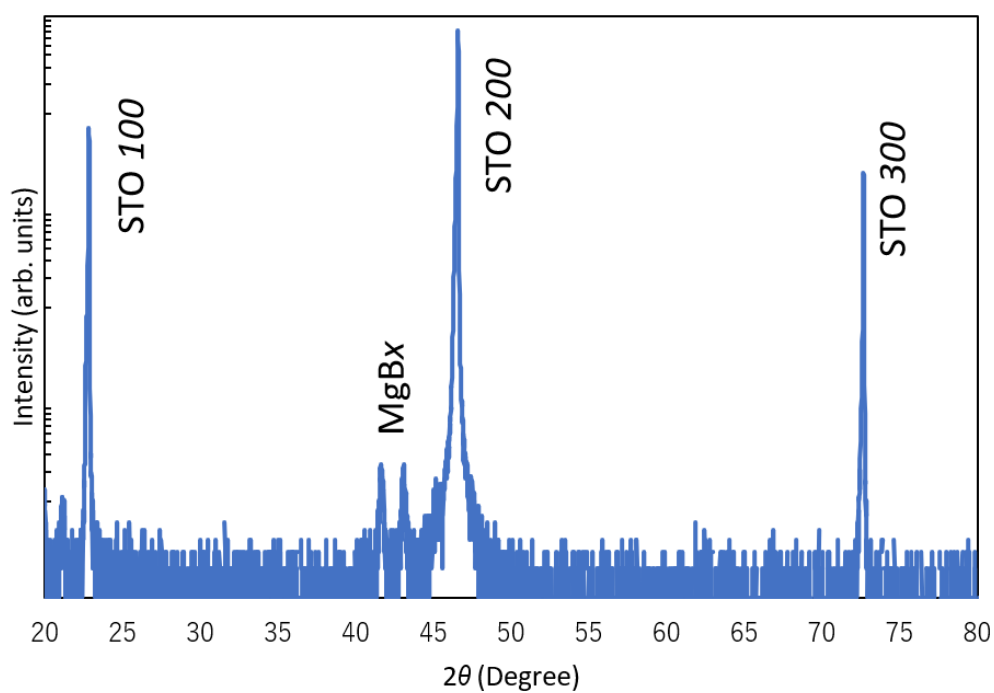

**Figure S2** Out-of-plane XRD pattern of the thin film fabricated via the one step PLD method

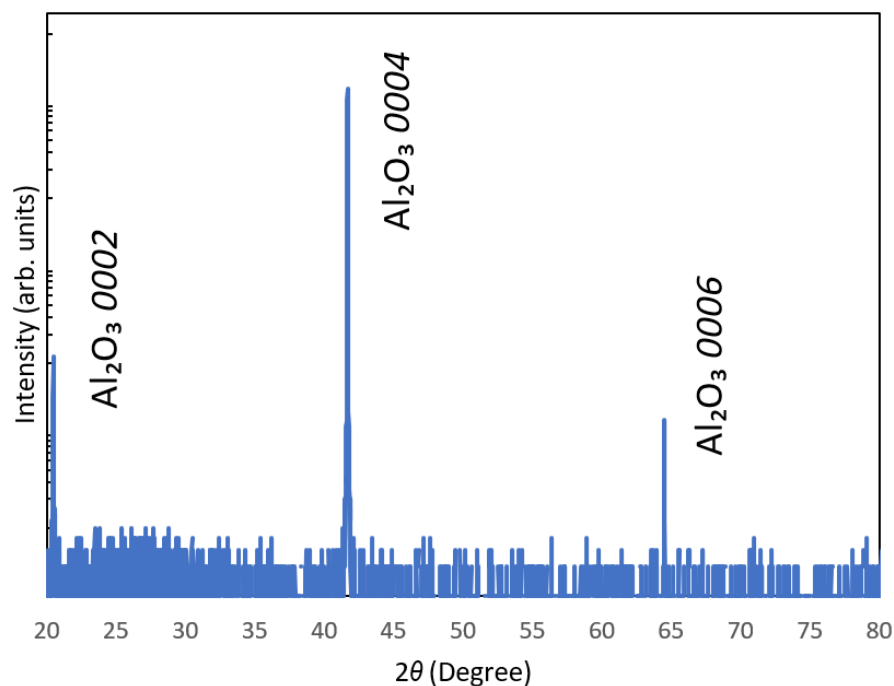

**Figure S3** Out-of-plane XRD pattern of the film prepared using a sapphire substrate by the two-step PLD method.

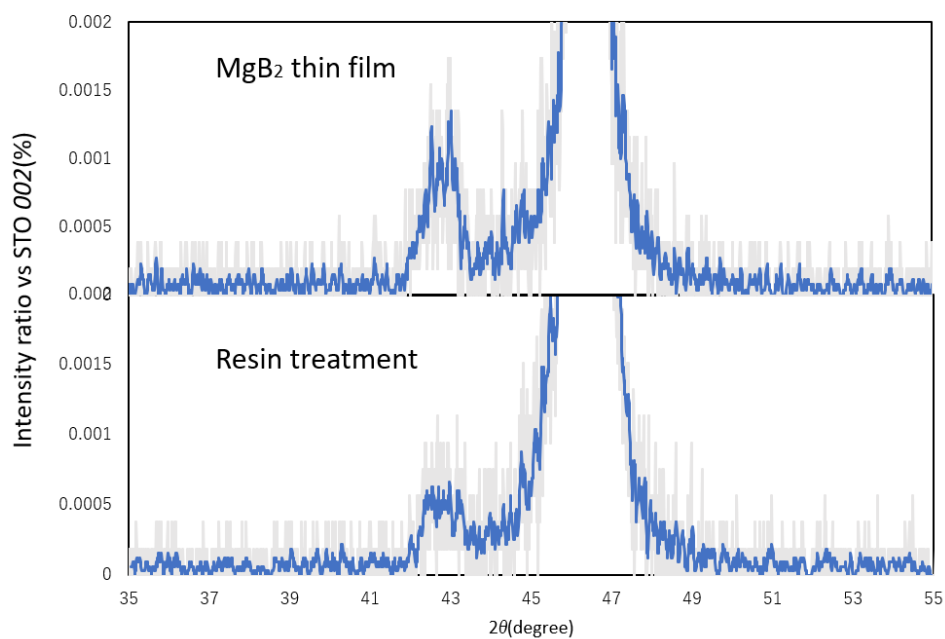

**Figure S4** XRD patterns of as-deposited  $\text{MgB}_2$  film (upper) and the film treated with ion-exchange resin for 3 days (lower). The peak intensities in XRD patterns were normalized as that of the (200) face of a  $\text{SrTiO}_3$  (STO) substrate to be 100 %. Gray lines are raw data. Blue lines represent moving average of raw data.

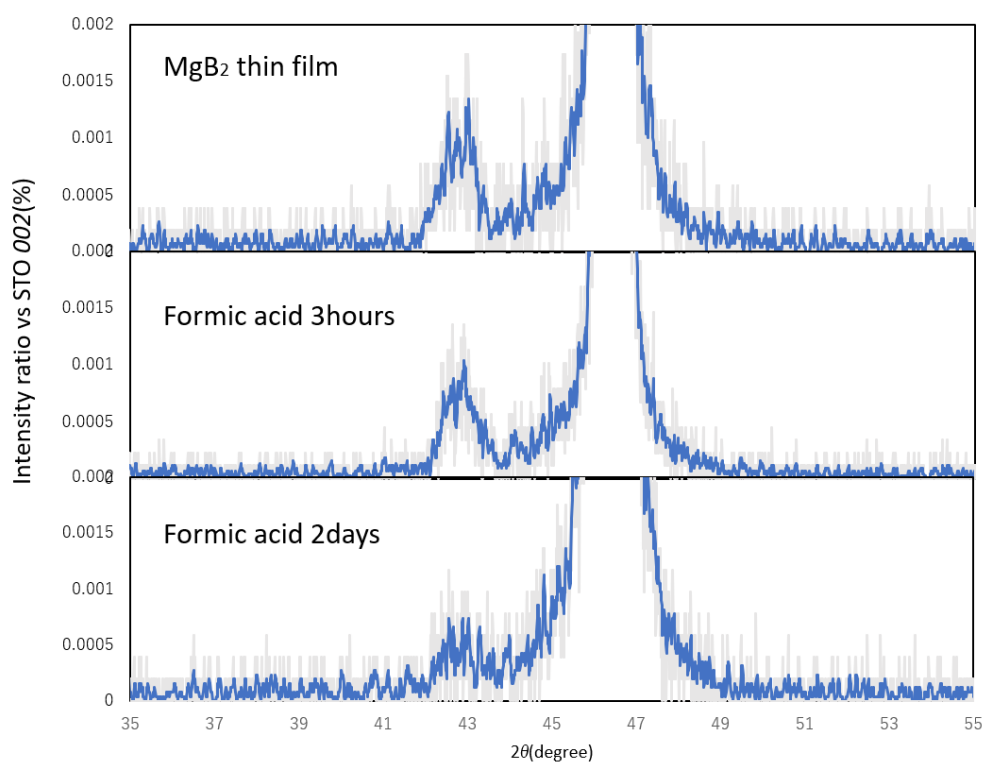

**Figure S5** XRD patterns of as-deposited  $\text{MgB}_2$  film and the film treated with formic acid. The peak intensities in XRD patterns were normalized as that of the (200) face of a  $\text{SrTiO}_3$  (STO) substrate to be 100 %. Gray lines are raw data. Blue lines represent moving average of raw data.

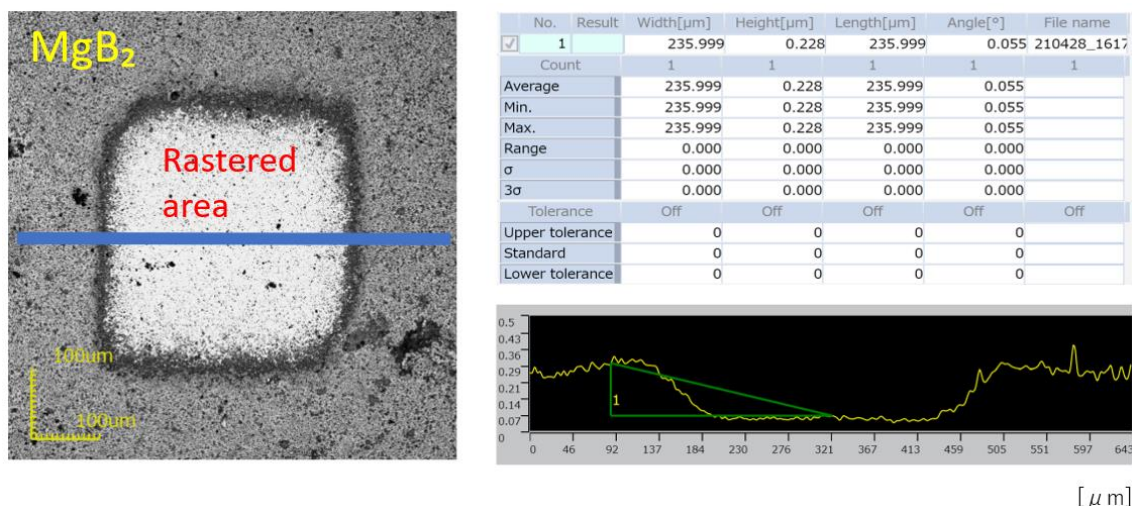

**Figure S6** The TOF-SIMS measurement rastered area image and depth profile observed by laser microscope. Blue line in the photo represents the line for depth profile shown in the right image.

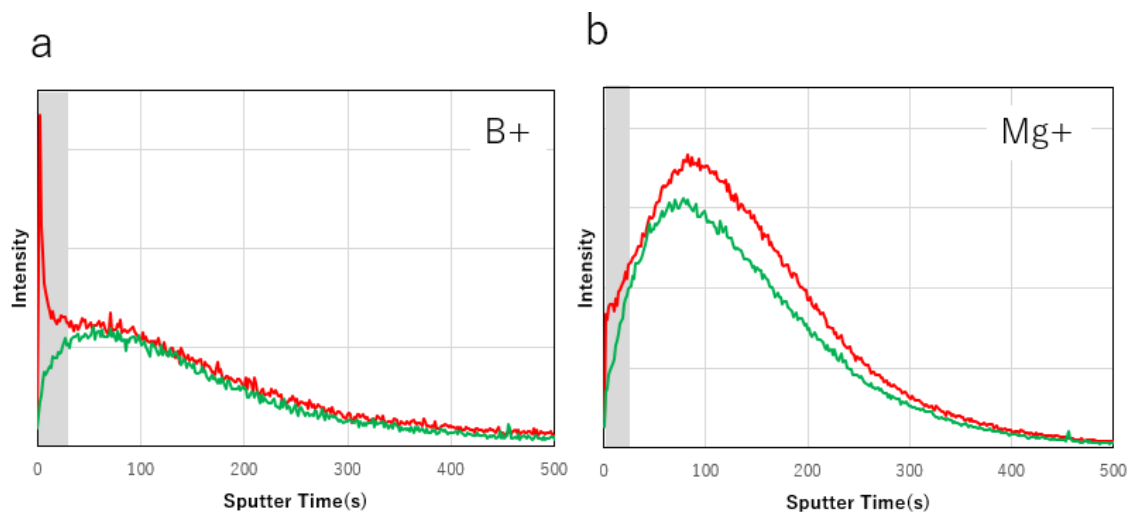

**Figure S7** TOF-SIMS analyses for B<sup>+</sup> (a) and Mg<sup>+</sup> (b) species in thin films. Red lines represent the profiles of the MgB<sub>2</sub> film before ion-exchange treatment, while green lines represent the those of ion-exchanged film using ion-exchange resin for 3 days.

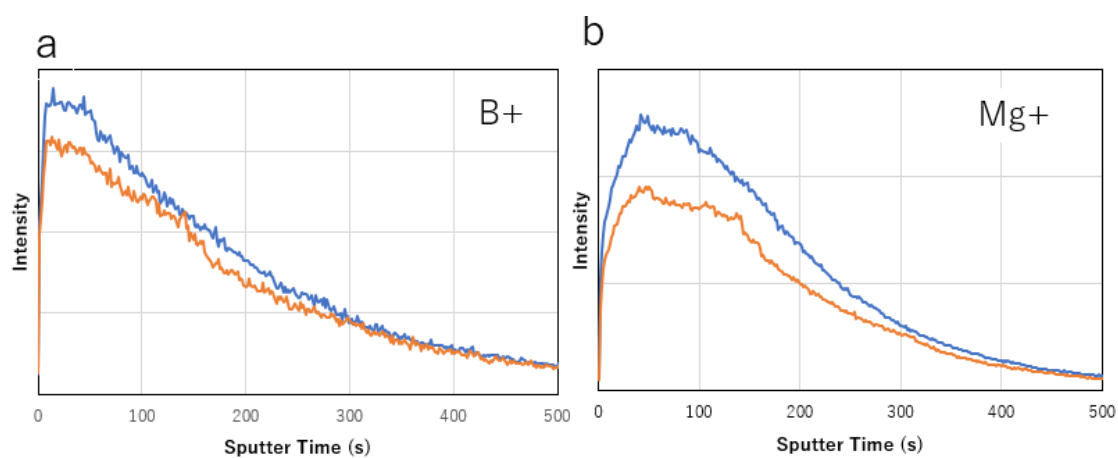

**Figure S8** TOF-SIMS analyses for B<sup>+</sup> (a) and Mg<sup>+</sup> (b) species in thin films. Blue lines represent the profiles of the thin film after 3 h treatment in formic acid, while orange lines represent the those after 2 days in formic acid.

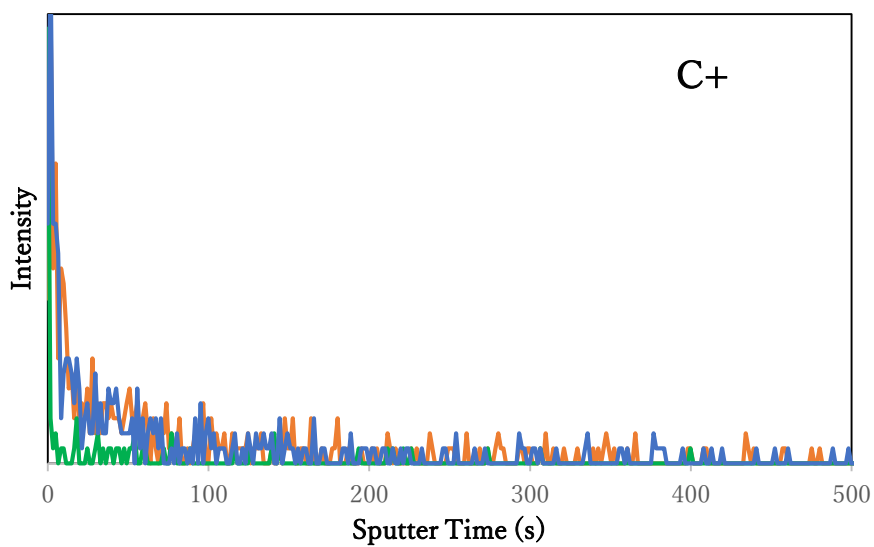

**Figure S9** TOF-SIMS analyses for C<sup>+</sup>. The green line represents the profiles of the film after 3 days treatment with resin, and blue and orange lines were the results of 3 h and 2 days with formic acid.

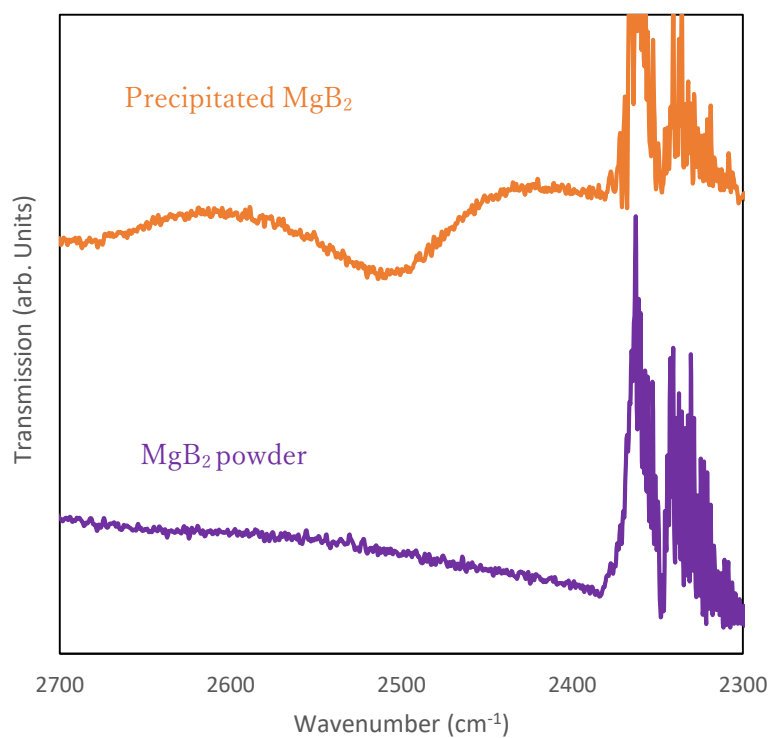

**Figure S10** FT-IR spectra of the commercial MgB<sub>2</sub> powder (purple line) and that treated with formic acid (orange line).

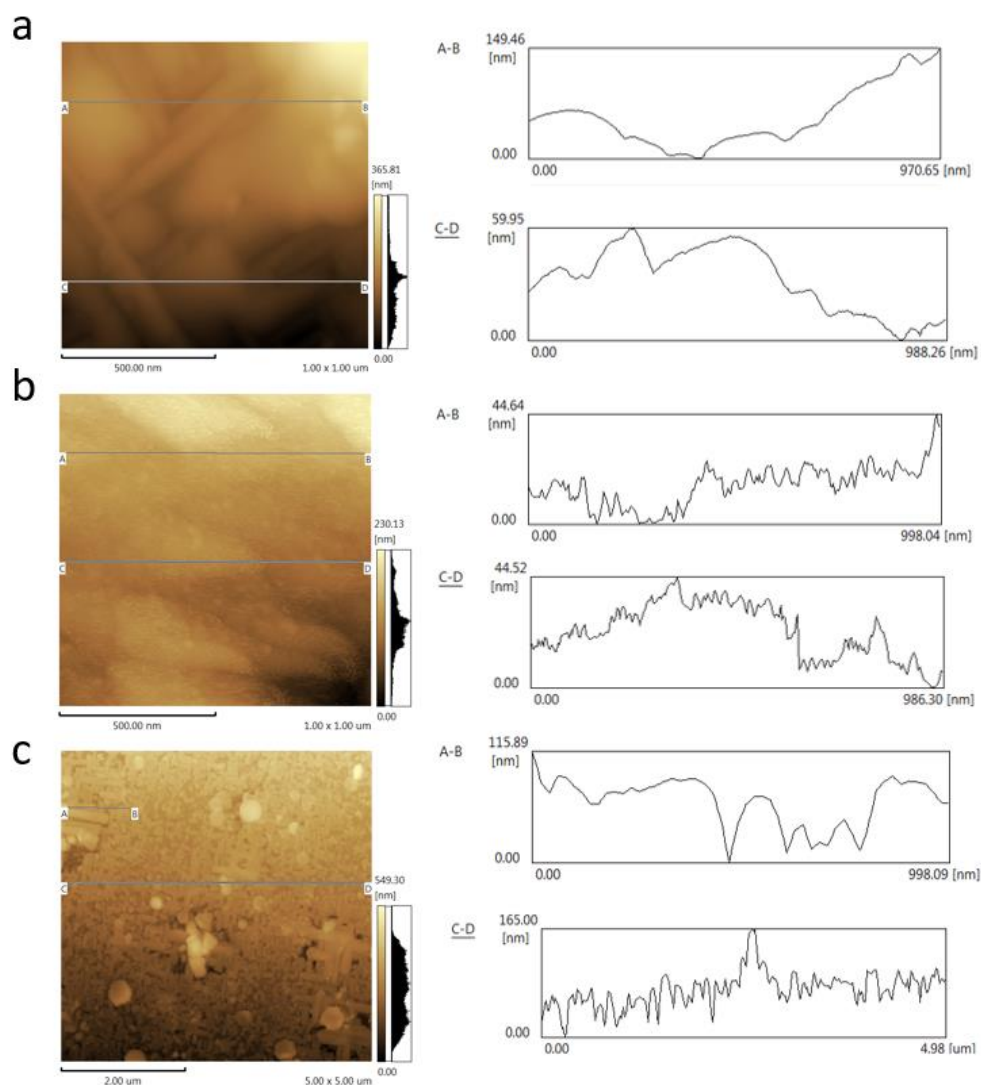

**Figure S11** AFM images of thin films and their line profiles (a:  $\text{MgB}_2$  thin film, b: ion-exchanged film by resin, c: ion-exchanged film by formic acid).

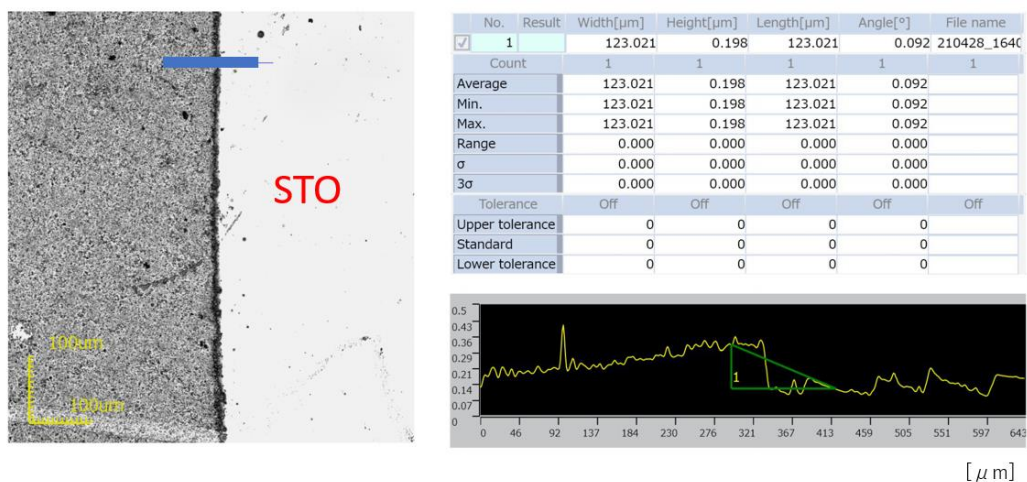

**Figure S12** Microscope image at the edge of the film treated by ion-exchange resin (left photo), and its depth profile analyzed by laser microscope (right image). Blue line in the photo represents the line for depth profile shown in the right image.
